# Supplementary material for: High lithium storage performance of CoO with a distinctive dual-carbon-confined nanoarchitecture
Source: Royal Society of Chemistry journal article supplement (doi:10.1039/d1nr02523f), 2021-01-01
Supplement: d1nr02523f1.pdf [file d1nr02523f1.pdf]

*Supporting Information*

**High lithium storage performance of CoO with a dual-carbon-confined nanoarchitecture**

Yanbin Chen<sup>a&</sup>, Jian Song<sup>a&</sup>, Yuexian Li<sup>a</sup>, Qinghua Tian<sup>a\*</sup>, Jizhang Chen<sup>b</sup> and Li Yang<sup>c\*</sup>

<sup>&</sup>Yanbin Chen and Jian Song contributed equally to this work.

<sup>a</sup>Key Laboratory of Surface & Interface Science of Polymer Materials of Zhejiang Province,

Department of Chemistry, Zhejiang Sci-Tech University,

Hangzhou, 310018, P. R. China

<sup>b</sup>College of Materials Science and Engineering, Nanjing Forestry University,

Nanjing, 210037, P. R. China

<sup>c</sup>School of Chemistry and Chemical Engineering, Shanghai Jiao Tong University,

Shanghai 200240, P. R. China

\*Corresponding author e-mail address: 09tqinghua@163.com, liyangce@sjtu.edu.cn

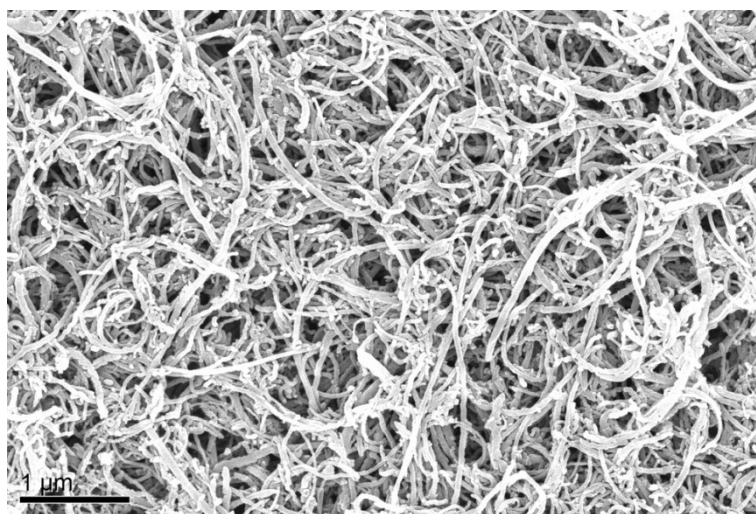

**Fig. S1** SEM image of CNTs.

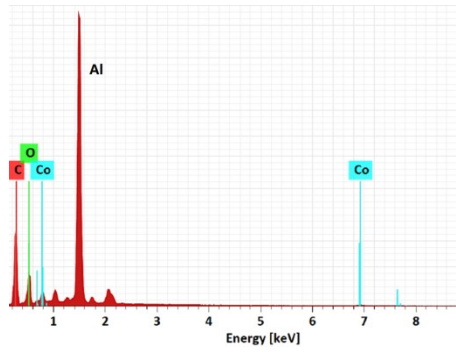

**Fig. S2** EDS spectrum of the CNTs@CoO@PC.

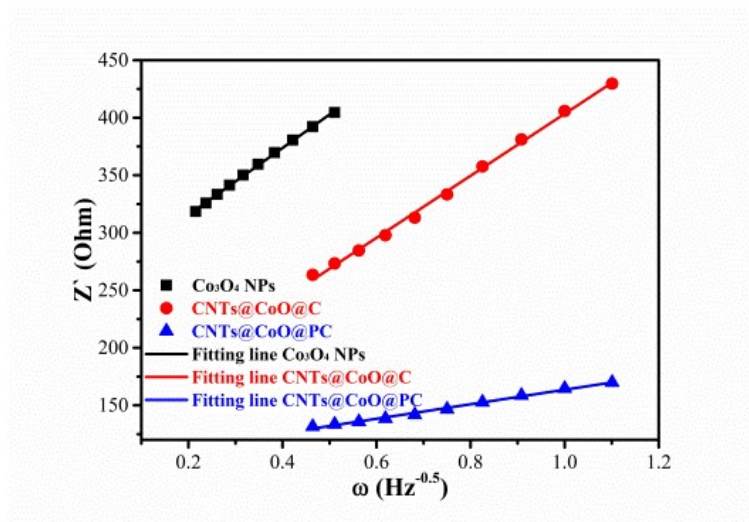

**Fig. S3** Plot of Real part of the complex impedance versus  $\omega^{-0.5}$  based on Fig. 6d.

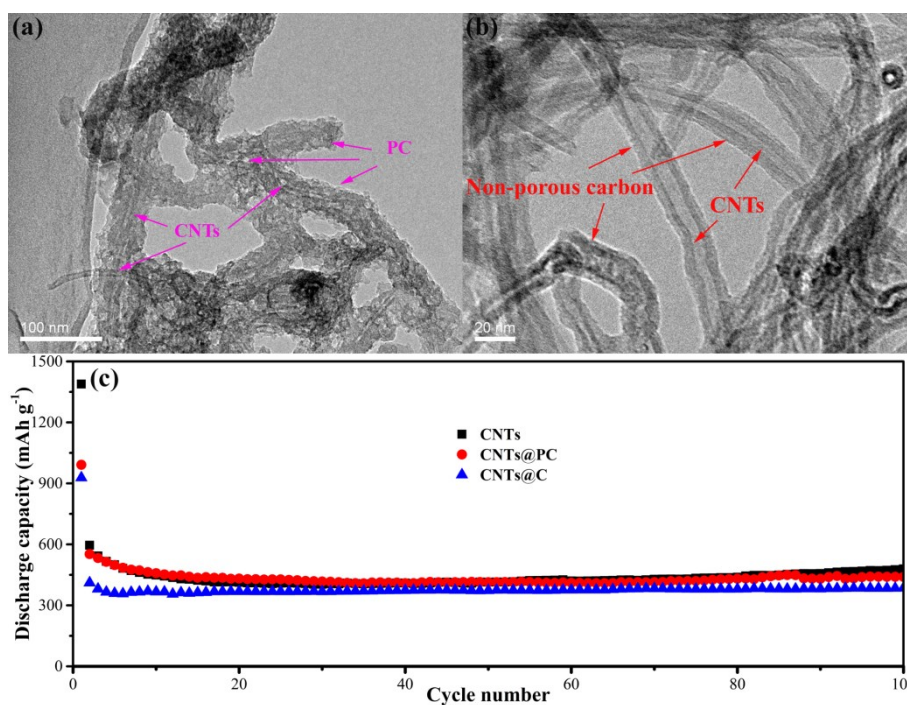

**Fig. S4** TEM images of (a) CNTs@PC and (b) CNTs@C; (c) Cycling performance of CNTs@PC,

CNTs@C and CNTs electrodes at 200 mA g<sup>-1</sup> between 0.01 and 3.0 V.

The CNTs@PC was prepared with the same way as CNTs@CoO@PC but using the CNTs to replace the CNTs@Co<sub>3</sub>O<sub>4</sub>. The CNTs@C was prepared with the same way as CNTs@CoO@C but using the CNTs to replace the CNTs@Co<sub>3</sub>O<sub>4</sub>.

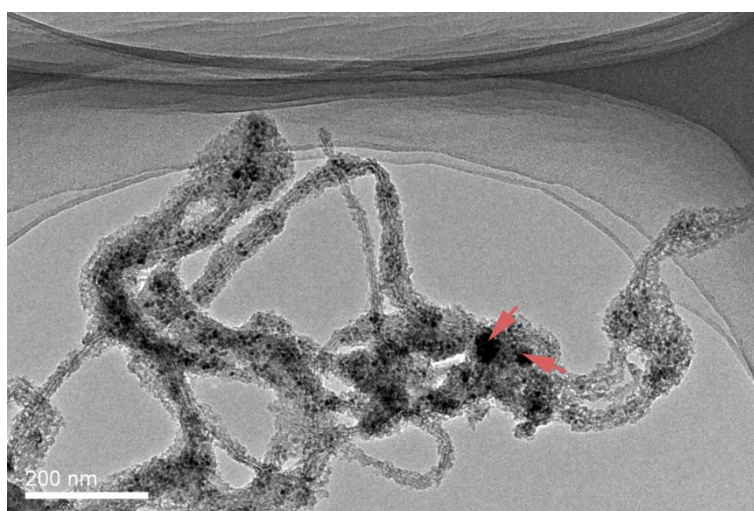

**Fig. S5** TEM image of CNTs@H-CoO@PC.

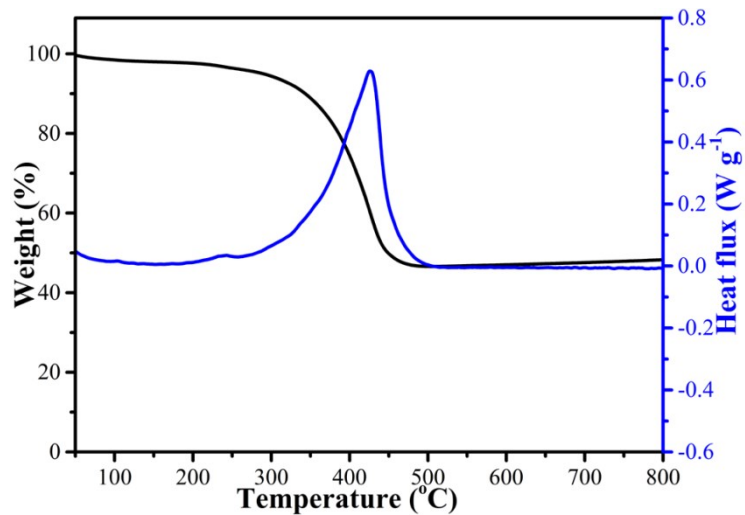

**Fig. S6** TG and DSC curves of CNTs@H-CoO@PC.

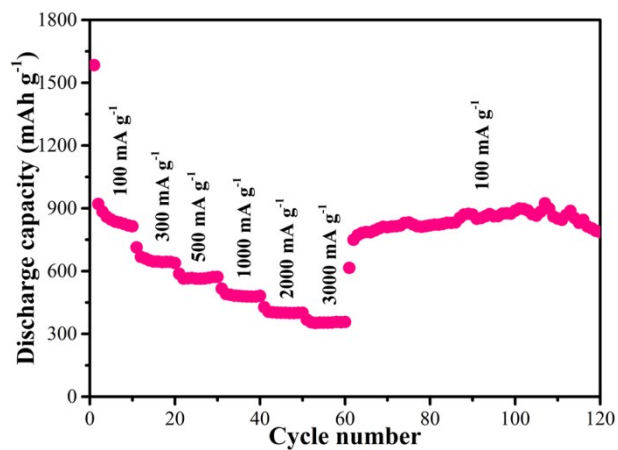

**Fig. S7** Rate performance of CNTs@CoO@C.

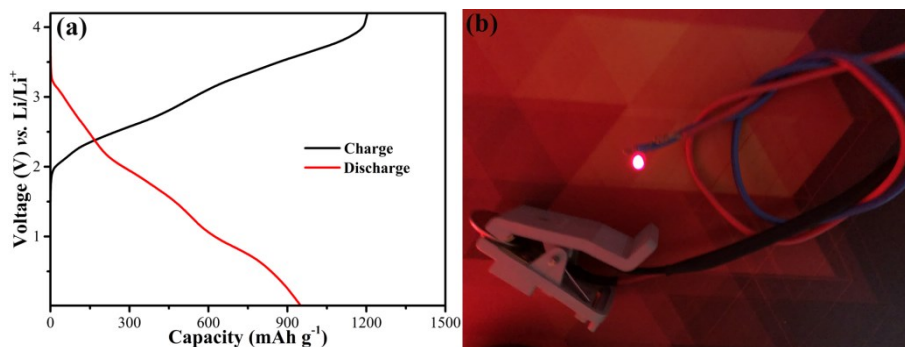

**Fig. S8** (a) The initial galvanostatic charge/discharge curves of a full cell at 0.2 C (1 C = 175 mA g<sup>-1</sup>)

between 0.01 and 4.2 V; (b) A LED bulb lighted by thus full cell.

For assembling full cells, the commercial LFP electrode (with a loading level of 6 mg/cm<sup>2</sup>) was employed as the cathode and the as-prepared CNTs@CoO@PC electrode as the anode. The mass loading for LFP is about 5 times larger than that for the CNTs@CoO@PC anode. The CNTs@CoO@PC anode were activated for two cycles with lithium metal counter electrode at 200 mA g<sup>-1</sup> between 0.01 and 3.0 V before assembling the full cells. The galvanostatic charge/discharge test of the as-assembled full cells was achieved at 0.2 C between 0.01 and 4.2 V based on a LAND CT2001a cell test system.
